# Supplementary material for: Halogenated PETN derivatives: interplay between physical and chemical factors in explosive sensitivity
Source: Royal Society of Chemistry journal article supplement (doi:10.1039/d3sc01627g), 2023-01-01
Supplement: d3sc01627g1.xlsx [file d3sc01627g1.xlsx]

## Sheet: CHNOF
ID	Name	Formula	SMILES	NC	NH	NN	NO	NC'	NN'	NO'	NX	Delta Hf (ref) kJ/mol	Delta Hf (model) kJ/mol
1	Dodecane, 1-fluoro-	(C12H25F)	CCCCCCCCCCCCF	12	25	0	0	0	0	0	1	-489.22	-473.8
2	Fluorodiphenylmethane	(C13H11F)	c1ccc(cc1)C(c1ccccc1)F	1	11	0	0	12	0	0	1	-42.6	-9
3	Tetradecane, 1-fluoro-	(C14H29F)	CCCCCCCCCCCCCCF	14	29	0	0	0	0	0	1	-533	-513.9
4	Fluoropentanitroethane	(C2FN5O10)	C(C(N(=O)=O)(N(=O)=O)N(=O)=O)(F)(N(=O)=O)N(=O)=O	2	0	0	0	0	5	10	1	-86.2	-99.16
5	Ethene, fluoro-	(C2H3F)	C=CF	0	3	0	0	2	0	0	1	-136	-132.07
6	1-Fluoro-1,1-dinitroethane	(C2H3FN2O4)	CC(F)(N(=O)=O)N(=O)=O	2	3	0	0	0	2	4	1	-256	-281.9
7	acetyl fluoride	(C2H3FO)	CC(=O)F	1	3	0	0	1	0	1	1	-445	-438.77
8	Ethyne, fluoro-	(C2HF)	C#CF	0	1	0	0	2	0	0	1	125.52	102.82
9	trans-1-Fluoro-1-propene	(C3H5F)	C/C=C/F	1	5	0	0	2	0	0	1	-173	-154
10	cis-1-Fluoro-1-propene	(C3H5F)	C/C=C\F	1	5	0	0	2	0	0	1	-176	-160.95
11	1-Fluoro-1,1,3,3-tetranitrobutane	(C4H5FN4O8)	CC(CC(F)(N(=O)=O)N(=O)=O)(N(=O)=O)N(=O)=O	4	5	0	0	0	4	8	1	-141	-306.03
12	N-Fluoro-n-butylnitramine	(C4H9FN2O2)	CCCCN(F)N(=O)=O	4	9	1	0	0	1	2	1	-112	-33.32
13	Cyclohexane, fluoro-	(C6H11F)	C1CCC(CC1)F	6	11	0	0	0	0	0	1	-336.6	-333.22
14	Fluorodinitrophenylmethane	(C7H5FN2O4)	c1ccc(cc1)C(F)(N(=O)=O)N(=O)=O	1	5	0	0	6	2	4	1	-185	-121.73
15	Benzene, 1-fluoro-4-methyl-	(C7H7F)	Cc1ccc(cc1)F	1	7	0	0	6	0	0	1	-147.5	-141.16
16	Benzene, (fluoromethyl)-	(C7H7F)	c1ccc(cc1)CF	1	7	0	0	6	0	0	1	-126.27	-123.77
17	1-Fluorononane	(C9H19F)	CCCCCCCCCF	9	19	0	0	0	0	0	1	-423.5	-413.59
18	Cyanogen fluoride	(CFN)	C(#N)F	0	0	0	0	1	1	0	1	35.98	11.32
19	Methyl fluoride	(CH3F)	CF	1	3	0	0	0	0	0	1	-234.2	-233.65
20	Fluoromethylene	(CHF)	[CH-]=[F+]	1	1	0	0	0	0	0	1	125.52	145.76
21	Fluorodinitromethane	(CHFN2O4)	C(F)(N(=O)=O)N(=O)=O	1	1	0	0	0	2	4	1	-235	-226.04
22	Formyl fluoride	(CHFO)	C(=O)F	0	1	0	0	1	0	1	1	-376.56	-381.15
23	Fluorine atom	(F)	[F]	0	0	0	0	0	0	0	1	79.38	81.68
24	Fluoroimidogen	(FN)	[F+]=[N-]	0	0	1	0	0	0	0	1	248.95	217.02
25	nitrosyl fluoride	(FNO)	FN=O	0	0	0	0	0	1	1	1	-65.69	-80.01
26	nitryl fluoride	(FNO2)	FN(=O)=O	0	0	0	0	0	1	2	1	-108.78	-131.54
27	Fluorine nitrate	(FNO3)	FON(=O)=O	0	0	0	1	0	1	2	1	10.46	-2.35
28	hydrogen fluoride	(FH)	F	0	1	0	0	0	0	0	1	-273.3	-248.83
29	HypoFluorous acid	(FHO)	FO	0	1	0	1	0	0	0	1	-98.32	-71.34
30	1,1'-Biphenyl, 4,4'-difluoro-	(C12H8F2)	c1cc(ccc1c1ccc(cc1)F)F	0	8	0	0	12	0	0	2	-205.4	-211.05
31	2,2'-Difluorobiphenyl	(C12H8F2)	c1ccc(c(c1)c1ccccc1F)F	0	8	0	0	12	0	0	2	-200.7	-201.29
32	1,1-Difluoro-1,2-diphenylethane	(C14H12F2)	c1ccc(cc1)CC(c1ccccc1)(F)F	2	12	0	0	12	0	0	2	-260.5	-270.72
33	1,2-Difluorotetranitroethane	(C2F2N4O8)	C(C(F)(N(=O)=O)N(=O)=O)(F)(N(=O)=O)N(=O)=O	2	0	0	0	0	4	8	2	-352	-334.84
34	Ethene, 1,1-difluoro-	(C2H2F2)	C=C(F)F	0	2	0	0	2	0	0	2	-344	-346.8
35	Ethane, 1,1-difluoro-	(C2H4F2)	CC(F)F	2	4	0	0	0	0	0	2	-497	-507.97
36	Propane, 2,2-difluoro-	(C3H6F2)	CC(C)(F)F	3	6	0	0	0	0	0	2	-543	-553.6
37	t-Butyldifluoroamine	(C4H9F2N)	CC(C)(C)N(F)F	4	9	1	0	0	0	0	2	-192	-177.02
38	Benzene, 1,2-difluoro-	(C6H4F2)	c1ccc(c(c1)F)F	0	4	0	0	6	0	0	2	-283	-300.66
39	Benzene, 1,4-difluoro-	(C6H4F2)	c1cc(ccc1F)F	0	4	0	0	6	0	0	2	-306.7	-313.67
40	Benzene, 1,3-difluoro-	(C6H4F2)	c1cc(cc(c1)F)F	0	4	0	0	6	0	0	2	-309.2	-316.36
41	N,N-Difluorobenzylamine	(C7H7F2N)	c1ccc(cc1)CN(F)F	1	7	1	0	6	0	0	2	7	20.2
42	1,1-Difluoro-3-phenylpropane	(C9H10F2)	c1ccc(cc1)CCC(F)F	3	10	0	0	6	0	0	2	-414.4	-404.54
43	Methylene, difluoro-	(CF2)	[C-](=[F+])F	1	0	0	0	0	0	0	2	-182	-204.05
44	Difluorodinitromethane	(CF2N2O4)	C(F)(F)(N(=O)=O)N(=O)=O	1	0	0	0	0	2	4	2	-403	-423.08
45	Carbonic difluoride	(CF2O)	C(=O)(F)F	0	0	0	0	1	0	1	2	-638.9	-610.12
46	Difluoromethane	(CH2F2)	C(F)F	1	2	0	0	0	0	0	2	-450.66	-455.28
47	fluorine	(F2)	FF	0	0	0	0	0	0	0	2	0	11.17
48	Nitrogen fluoride, (E)-	(F2N2)	F/N=N/F	0	0	0	0	0	2	0	2	81.17	84.34
49	(Z)-Difluorodiazene	(F2N2)	F/N=N\F	0	0	0	0	0	2	0	2	68.62	76.53
50	Oxygen difluoride	(F2O)	FOF	0	0	0	1	0	0	0	2	24.52	27.12

## Sheet: CHNOCl
ID	Name	Formula	SMILES	NC	NH	NN	NO	NC'	NN'	NO'	NX	Delta Hf (ref) kJ/mol	Delta Hf (model) kJ/mol
1	Naphthalene, 2-chloro-	(C10H7Cl)	c1ccc2cc(ccc2c1)Cl	0	7	0	0	10	0	0	1	137	117.81
2	Naphthalene, 1-chloro-	(C10H7Cl)	c1ccc2c(c1)cccc2Cl	0	7	0	0	10	0	0	1	115	121.12
3	Dodecane, 1-chloro-	(C12H25Cl)	CCCCCCCCCCCCCl	12	25	0	0	0	0	0	1	-322	-318.19
4	Dibenzo[b,e][1,4]dioxin, 2-chloro-	(C12H7ClO2)	c1ccc2c(c1)Oc1ccc(cc1O2)Cl	0	7	0	2	12	0	0	1	-74.1	-86.8
5	Octadecane, 1-chloro-	(C18H37Cl)	CCCCCCCCCCCCCCCCCCCl	18	37	0	0	0	0	0	1	-446	-438.54
6	Ethene, chloro-	(C2H3Cl)	C=CCl	0	3	0	0	2	0	0	1	22	29.13
7	Methylchlorocarbene	(C2H3Cl)	CC#[Cl]	2	3	0	0	0	0	0	1	212	239.74
8	3-Methyl-3-chlorodiazirine	(C2H3ClN2)	CC1(Cl)N=N1	2	3	0	0	0	2	0	1	233	249.29
9	Ethane, 1-chloro-1,1-dinitro-	(C2H3ClN2O4)	CC(Cl)(N(=O)=O)N(=O)=O	2	3	0	0	0	2	4	1	-113	-95.8
10	Acetyl chloride	(C2H3ClO)	CC(=O)Cl	1	3	0	0	1	0	1	1	-251	-249.24
11	Ethyl Chloride	(C2H5Cl)	CCCl	2	5	0	0	0	0	0	1	-109	-116.65
12	Ethyne, chloro-	(C2HCl)	C#CCl	0	1	0	0	2	0	0	1	213.8	223.67
13	Allyl chloride	(C3H5Cl)	C=CCCl	1	5	0	0	2	0	0	1	-5.6	3.03
14	1-Propene, 1-chloro-, (Z)-	(C3H5Cl)	C/C=C\Cl	1	5	0	0	2	0	0	1	-15	-3.3
15	1-Propene, 2-chloro-	(C3H5Cl)	C=C(C)Cl	1	5	0	0	2	0	0	1	-24.7	-11.36
16	trans-1-Chloropropene	(C3H5Cl)	C/C=C/Cl	1	5	0	0	2	0	0	1	-12	3.54
17	1-Propene, 1-chloro-	(C3H5Cl)	CC=CCl	1	5	0	0	2	0	0	1	-4.6	3.54
18	Oxirane, (chloromethyl)-	(C3H5ClO)	C(C1CO1)Cl	3	5	0	1	0	0	0	1	-108	-129.79
19	Acetic acid, chloro-, methyl ester	(C3H5ClO2)	COC(=O)CCl	2	5	0	1	1	0	1	1	-444	-421.83
20	Carbonochloridic acid, ethyl ester	(C3H5ClO2)	CCOC(=O)Cl	2	5	0	1	1	0	1	1	-459.4	-444.18
21	n-Propyl chloride	(C3H7Cl)	CCCCl	3	7	0	0	0	0	0	1	-132.5	-137.15
22	Propane, 2-chloro-	(C3H7Cl)	CC(C)Cl	3	7	0	0	0	0	0	1	-144	-136.59
23	Ethane, 1-chloro-1-methoxy-	(C3H7ClO)	CC(Cl)OC	3	7	0	1	0	0	0	1	-273	-274.93
24	1-Chloro-1,1,3,3-tetranitrobutane	(C4H5ClN4O8)	CC(CC(Cl)(N(=O)=O)N(=O)=O)(N(=O)=O)N(=O)=O	4	5	0	0	0	4	8	1	-141	-118.23
25	1-Butene, 3-chloro-	(C4H7Cl)	C=CC(C)Cl	2	7	0	0	2	0	0	1	-45.61	-26.89
26	2-Butene, 1-chloro-	(C4H7Cl)	CC=CCCl	2	7	0	0	2	0	0	1	-49.37	-33.46
27	1-Butene, 1-chloro-, (Z)-	(C4H7Cl)	CC/C=C\Cl	2	7	0	0	2	0	0	1	-19.2	-25.39
28	2-Chloro-1-butene	(C4H7Cl)	CCC(=C)Cl	2	7	0	0	2	0	0	1	-29.3	-29.74
29	Trans-1-chloro-1-butene	(C4H7Cl)	CC/C=C/Cl	2	7	0	0	2	0	0	1	-16.5	-24.79
30	4-chlorobut-1-ene	(C4H7Cl)	C=CCCCl	2	7	0	0	2	0	0	1	-28.9	-20.39
31	(E)-1-chlorobut-2-ene	(C4H7Cl)	C/C=C/CCl	2	7	0	0	2	0	0	1	-43.1	-33.46
32	(Z)-1-chlorobut-2-ene	(C4H7Cl)	C/C=C\CCl	2	7	0	0	2	0	0	1	-37.7	-26.66
33	Butane, 1-chloro-	(C4H9Cl)	CCCCCl	4	9	0	0	0	0	0	1	-154.6	-157.23
34	Propane, 2-chloro-2-methyl-	(C4H9Cl)	CC(C)(C)Cl	4	9	0	0	0	0	0	1	-179.9	-156.64
35	Butane, 2-chloro-	(C4H9Cl)	CCC(C)Cl	4	9	0	0	0	0	0	1	-166.66	-153.92
36	1-Chloro-2-ethoxyethane	(C4H9ClO)	CCOCCCl	4	9	0	1	0	0	0	1	-297.1	-279.96
37	Pentane, 1-chloro-	(C5H11Cl)	CCCCCCl	5	11	0	0	0	0	0	1	-175.2	-177.55
38	Butane, 1-chloro-3-methyl-	(C5H11Cl)	CC(C)CCCl	5	11	0	0	0	0	0	1	-171	-170.36
39	1,1,1-Trimethoxy-2-chloroethane	(C5H11ClO3)	COC(CCl)(OC)OC	5	11	0	3	0	0	0	1	-614	-556.84
40	Chloroacetic acid, propyl ester	(C5H9ClO2)	CCCOC(=O)CCl	4	9	0	1	1	0	1	1	-467.4	-474.52
41	Cyclohexane, chloro-	(C6H11Cl)	C1CCC(CC1)Cl	6	11	0	0	0	0	0	1	-166.5	-166.48
42	3-Ethyl-3-(chloromethyl)-oxetane	(C6H11ClO)	CCC1(CCl)COC1	6	11	0	1	0	0	0	1	-193.3	-192.08
43	Propanoic acid, 3-chloro-, propyl ester	(C6H11ClO2)	CCCOC(=O)CCCl	5	11	0	1	1	0	1	1	-485.8	-511.33
44	Butanoic acid, 4-chloro-, ethyl ester	(C6H11ClO2)	CCOC(=O)CCCCl	5	11	0	1	1	0	1	1	-513.8	-521.52
45	5-Chloro-beznofurazan oxide	(C6H3ClN2O2)	c1cc2c(cc1Cl)non2=O	0	3	0	1	6	2	1	1	274.7	261.15
46	Benzene, chloro-	(C6H5Cl)	c1ccc(cc1)Cl	0	5	0	0	6	0	0	1	54.42	51.97
47	3-Chloropropanoic acid butyl ester	(C7H13ClO2)	CCCCOC(=O)CCCl	6	13	0	1	1	0	1	1	-502.5	-531.47
48	2-Chloropropanoic acid butyl ester	(C7H13ClO2)	CCCCOC(=O)C(C)Cl	6	13	0	1	1	0	1	1	-517.6	-525.66
49	3-Chloropropanoic acid 2-methylpropyl ester	(C7H13ClO2)	CC(C)COC(=O)CCCl	6	13	0	1	1	0	1	1	-517.6	-532.53
50	Propanoic acid, 2-chloro, 2-methylpropyl ester	(C7H13ClO2)	CC(C)COC(=O)C(C)Cl	6	13	0	1	1	0	1	1	-549.8	-527.57
51	Chloroacetic acid 3-methylbutyl ester	(C7H13ClO2)	CC(C)CCOC(=O)CCl	6	13	0	1	1	0	1	1	-516.7	-522.61
52	Butanoic acid, 4-chloro, propyl ester	(C7H13ClO2)	CCCOC(=O)CCCCl	6	13	0	1	1	0	1	1	-538.1	-540.34
53	Propyl 3-chlorobutanoate	(C7H13ClO2)	CCCOC(=O)CC(C)Cl	6	13	0	1	1	0	1	1	-538.1	-544.68
54	Butanoic acid, 2-chloro-, propyl ester	(C7H13ClO2)	CCCOC(=O)C(CC)Cl	6	13	0	1	1	0	1	1	-578.6	-521.53
55	4-Nitrobenzoyl chloride	(C7H4ClNO3)	c1cc(ccc1C(=O)Cl)N(=O)=O	0	4	0	0	7	1	3	1	-100.7	-134.53
56	Benzoyl chloride	(C7H5ClO)	c1ccc(cc1)C(=O)Cl	0	5	0	0	7	0	1	1	-109	-114.64
57	Benzoic acid, 4-chloro-	(C7H5ClO2)	c1cc(ccc1C(=O)O)Cl	0	5	0	1	7	0	1	1	-324.8	-297.62
58	Benzoic acid, 3-chloro-	(C7H5ClO2)	c1cc(cc(c1)Cl)C(=O)O	0	5	0	1	7	0	1	1	-321.8	-295.48
59	Benzoic acid, 2-chloro-	(C7H5ClO2)	c1ccc(c(c1)C(=O)O)Cl	0	5	0	1	7	0	1	1	-304.2	-295.55
60	Benzyl chloride	(C7H7Cl)	c1ccc(cc1)CCl	1	7	0	0	6	0	0	1	19	28.24
61	Benzenamine, 3-chloro-4-methyl-	(C7H8ClN)	Cc1ccc(cc1Cl)N	1	8	1	0	6	0	0	1	75.3	31.41
62	Propanoic acid, 2-chloro, 3-methylbutyl ester	(C8H15ClO2)	CC(C)CCOC(=O)C(C)Cl	7	15	0	1	1	0	1	1	-574.9	-543.57
63	3-Chloropropanoic acid 3-methylbutyl ester	(C8H15ClO2)	CC(C)CCOC(=O)CCCl	7	15	0	1	1	0	1	1	-539.3	-549.37
64	Butanoic acid, 2-chloro, 2-methylpropyl ester	(C8H15ClO2)	CCC(C(=O)OCC(C)C)Cl	7	15	0	1	1	0	1	1	-609.2	-545.75
65	Butanoic acid, 3-chloro, 2-methylpropyl ester	(C8H15ClO2)	CC(C)COC(=O)CC(C)Cl	7	15	0	1	1	0	1	1	-571.1	-566.03
66	Butanoic acid, 4-chloro, 2-methylpropyl ester	(C8H15ClO2)	CC(C)COC(=O)CCCCl	7	15	0	1	1	0	1	1	-576.6	-562.81
67	Butanoic acid, 3-chloro, butyl ester	(C8H15ClO2)	CCCCOC(=O)CC(C)Cl	7	15	0	1	1	0	1	1	-557.7	-564.64
68	Butanoic acid, 4-chloro, butyl ester	(C8H15ClO2)	CCCCOC(=O)CCCCl	7	15	0	1	1	0	1	1	-563.6	-561.46
69	Butyl 2-chlorobutyrate	(C8H15ClO2)	CCCCOC(=O)C(CC)Cl	7	15	0	1	1	0	1	1	-602.5	-541.49
70	Octane, 1-chloro-	(C8H17Cl)	CCCCCCCCCl	8	17	0	0	0	0	0	1	-238.9	-237.91
71	3-Chloro-4-methylphenylisocyanate	(C8H6ClNO)	Cc1ccc(cc1Cl)N=C=O	1	6	0	0	7	1	1	1	-77	-69.83
72	Benzoyl chloride, 4-methyl-	(C8H7ClO)	Cc1ccc(cc1)C(=O)Cl	1	7	0	0	7	0	1	1	-139.7	-147.79
73	Benzoic acid, 4-chloro-, methyl ester	(C8H7ClO2)	COC(=O)c1ccc(cc1)Cl	1	7	0	1	7	0	1	1	-305	-311.33
74	Benzoyl chloride, 4-methoxy-	(C8H7ClO2)	COc1ccc(cc1)C(=O)Cl	1	7	0	1	7	0	1	1	-261.8	-276.53
75	4-chloro-N,N-dimethylbenzamide	(C9H10ClNO)	CN(C)C(=O)c1ccc(cc1)Cl	2	10	1	0	7	0	1	1	-111	-114.41
76	Butanoic acid, 4-chloro, 3-methylbutyl ester	(C9H17ClO2)	CC(C)CCOC(=O)CCCCl	8	17	0	1	1	0	1	1	-600.8	-579.31
77	Butanoic acid, 3-chloro, 3-methylbutyl ester	(C9H17ClO2)	CC(C)CCOC(=O)CC(C)Cl	8	17	0	1	1	0	1	1	-589.9	-582.5
78	Butanoic acid, 2-chloro, 3-methylbutyl ester	(C9H17ClO2)	CCC(C(=O)OCCC(C)C)Cl	8	17	0	1	1	0	1	1	-630.1	-565.31
79	Cloxyquin	(C9H6ClNO)	c1cc2c(ccc(c2nc1)O)Cl	0	6	0	1	9	1	0	1	-25.5	14.1
80	Cyanogen chloride	(CClN)	C(#N)Cl	0	0	0	0	1	1	0	1	137.95	131.77
81	Methane, chlorotrinitro-	(CClN3O6)	C(Cl)(N(=O)=O)(N(=O)=O)N(=O)=O	1	0	0	0	0	3	6	1	21	11.55
82	Chloromethane	(CH3Cl)	CCl	1	3	0	0	0	0	0	1	-83.68	-85.9
83	Chlorine atom	(Cl)	[Cl]	0	0	0	0	0	0	0	1	121.3	106.85
84	Nitrosyl chloride	(ClNO)	ClN=O	0	0	0	0	0	1	1	1	51.71	42.5
85	Nitryl chloride	(ClNO2)	[Cl-].N([O])[O]	0	0	0	0	0	1	2	1	12.13	-14.24
86	Monochlorine monoxide	(ClO)	Cl[O]	0	0	0	1	0	0	0	1	101.22	89.65
87	Hydrogen chloride	(ClH)	Cl	0	1	0	0	0	0	0	1	-92.31	-81.37
88	1,1'-Biphenyl, 4,4'-dichloro-	(C12H8Cl2)	c1cc(ccc1c1ccc(cc1)Cl)Cl	0	8	0	0	12	0	0	2	120	118.21
89	1,1'-Biphenyl, 2,2'-dichloro-	(C12H8Cl2)	c1ccc(c(c1)c1ccccc1Cl)Cl	0	8	0	0	12	0	0	2	127.9	118.18
90	Ethyne, dichloro-	(C2Cl2)	C(#CCl)Cl	0	0	0	0	2	0	0	2	209.62	208.9
91	1,2-Dichloro-1,1,2,2-tetranitroethane	(C2Cl2N4O8)	C(C(Cl)(N(=O)=O)N(=O)=O)(Cl)(N(=O)=O)N(=O)=O	2	0	0	0	0	4	8	2	36	27.23
92	Oxalyl chloride	(C2Cl2O2)	C(=O)(C(=O)Cl)Cl	0	0	0	0	2	0	2	2	-335.8	-355.07
93	Ethene, 1,1-dichloro-	(C2H2Cl2)	C=C(Cl)Cl	0	2	0	0	2	0	0	2	2.2	2.2
94	Ethylene, 1,2-dichloro-, (Z)-	(C2H2Cl2)	C(=C\Cl)\Cl	0	2	0	0	2	0	0	2	-3	-4.44
95	Ethylene, 1,2-dichloro-, (E)-	(C2H2Cl2)	C(=C\Cl)/Cl	0	2	0	0	2	0	0	2	-1	2.2
96	Acetyl chloride, chloro-	(C2H2Cl2O)	C(C(=O)Cl)Cl	1	2	0	0	1	0	1	2	-246	-265.83
97	Ethane, 1,2-dichloro-	(C2H4Cl2)	C(CCl)Cl	2	4	0	0	0	0	0	2	-132	-150.36
98	Ethane, 1,1-dichloro-	(C2H4Cl2)	CC(Cl)Cl	2	4	0	0	0	0	0	2	-132.5	-150.36
99	1,3-Dichloro-1,1,3,3-tetranitropropane	(C3H2Cl2N4O8)	C(C(Cl)(N(=O)=O)N(=O)=O)C(Cl)(N(=O)=O)N(=O)=O	3	2	0	0	0	4	8	2	-73.6	-74.71
100	Propane, 1,1-dichloro-1-nitro-	(C3H5Cl2NO2)	CCC(Cl)(Cl)N(=O)=O	3	5	0	0	0	1	2	2	-168	-146.07
101	Propane, 1,2-dichloro-	(C3H6Cl2)	CC(CCl)Cl	3	6	0	0	0	0	0	2	-162.8	-179.95
102	Propane, 2,2-dichloro-	(C3H6Cl2)	CC(C)(Cl)Cl	3	6	0	0	0	0	0	2	-176.7	-179.95
103	1-Propanol, 2,3-dichloro-	(C3H6Cl2O)	C(C(CO)Cl)Cl	3	6	0	1	0	0	0	2	-316	-322.54
104	Butane, 1,4-dichloro-	(C4H8Cl2)	C(CCCl)CCl	4	8	0	0	0	0	0	2	-183.4	-195.25
105	Butane, 1,2-dichloro-	(C4H8Cl2)	CCC(CCl)Cl	4	8	0	0	0	0	0	2	-191.2	-191.05
106	Butane, 1,3-dichloro-	(C4H8Cl2)	CC(CCCl)Cl	4	8	0	0	0	0	0	2	-195	-199.32
107	Butane, 2,3-dichloro-, (R*,S*)-	(C4H8Cl2)	C[C@@H]([C@@H](C)Cl)Cl	4	8	0	0	0	0	0	2	-202.3	-204.3
108	Butane, 2,3-dichloro-, (R*,R*)-(.+/-.)-	(C4H8Cl2)	C[C@@H]([C@H](C)Cl)Cl	4	8	0	0	0	0	0	2	-202.2	-200.51
109	Oxetane, 3,3-bis-(chloromethyl)	(C5H8Cl2O)	C(C1(CCl)COC1)Cl	5	8	0	1	0	0	0	2	-204	-211.55
110	Dichloroacetic acid butyl ester	(C6H10Cl2O2)	CCCCOC(=O)C(Cl)Cl	5	10	0	1	1	0	1	2	-497.9	-507.51
111	Dichloroacetic acid 2-methylpropyl ester	(C6H10Cl2O2)	CC(C)COC(=O)C(Cl)Cl	5	10	0	1	1	0	1	2	-501.7	-503.66
112	Benzene, 1,4-dichloro-	(C6H4Cl2)	c1cc(ccc1Cl)Cl	0	4	0	0	6	0	0	2	24.6	14.6
113	Benzene, 1,2-dichloro-	(C6H4Cl2)	c1ccc(c(c1)Cl)Cl	0	4	0	0	6	0	0	2	33	14.6
114	Benzene, 1,3-dichloro-	(C6H4Cl2)	c1cc(cc(c1)Cl)Cl	0	4	0	0	6	0	0	2	28.1	14.6
115	Phenol, 2,4-dichloro-	(C6H4Cl2O)	c1cc(c(cc1Cl)Cl)O	0	4	0	1	6	0	0	2	-156.3	-143.96
116	Phenol, 2,6-dichloro-	(C6H4Cl2O)	c1cc(c(c(c1)Cl)O)Cl	0	4	0	1	6	0	0	2	-146.3	-150.8
117	Phenol, 2,5-dichloro-	(C6H4Cl2O)	c1cc(c(cc1Cl)O)Cl	0	4	0	1	6	0	0	2	-158.4	-150.8
118	Phenol, 3,5-dichloro-	(C6H4Cl2O)	c1c(cc(cc1Cl)O)Cl	0	4	0	1	6	0	0	2	-148.2	-150.8
119	Phenol, 3,4-dichloro-	(C6H4Cl2O)	c1cc(c(cc1O)Cl)Cl	0	4	0	1	6	0	0	2	-150.3	-143.08
120	Phenol, 2,3-dichloro-	(C6H4Cl2O)	c1cc(c(c(c1)O)Cl)Cl	0	4	0	1	6	0	0	2	-151.6	-143.07
121	Dichloroacetic acid 3-methylbutyl ester	(C7H12Cl2O2)	CC(C)CCOC(=O)C(Cl)Cl	6	12	0	1	1	0	1	2	-519.7	-525.57
122	Benzoyl chloride, 4-chloro-	(C7H4Cl2O)	c1cc(ccc1C(=O)Cl)Cl	0	4	0	0	7	0	1	2	-128.9	-153.28
123	Chloroxine	(C9H5Cl2NO)	c1cc2c(cc(c(c2nc1)O)Cl)Cl	0	5	0	1	9	1	0	2	-48.8	-26.37
124	Phosgene	(CCl2O)	C(=O)(Cl)Cl	0	0	0	0	1	0	1	2	-220.1	-242.02
125	Methylene chloride	(CH2Cl2)	C(Cl)Cl	1	2	0	0	0	0	0	2	-95.52	-109.31
126	Chlorine	(Cl2)	ClCl	0	0	0	0	0	0	0	2	0	-15.33
127	Dichlorine monoxide	(Cl2O)	ClOCl	0	0	0	1	0	0	0	2	87.86	68.58

## Sheet: CHNOBr
ID	Name	Formula	SMILES	NC	NH	NN	NO	NC'	NN'	NO'	NX	Delta Hf (ref) kJ/mol	Delta Hf (model) kJ/mol
1	Bromine	(Br)	[Br]	0	0	0	0	0	0	0	1	111.87	107.3
2	Nitrosyl bromide	(BrNO)	BrN=O	0	0	0	0	0	1	1	1	82.13	72.5
3	Naphthalene, 1-bromo-	(C10H7Br)	c1ccc2c(c1)cccc2Br	0	7	0	0	10	0	0	1	174.3	175.05
4	Naphthalene, 2-bromo-	(C10H7Br)	c1ccc2cc(ccc2c1)Br	0	7	0	0	10	0	0	1	175.6	170.79
5	Dodecane, 1-bromo-	(C12H25Br)	CCCCCCCCCCCCBr	12	25	0	0	0	0	0	1	-269.9	-269.78
6	Hexadecane, 1-bromo-	(C16H33Br)	CCCCCCCCCCCCCCCCBr	16	33	0	0	0	0	0	1	-350.1	-350.03
7	Vinyl bromide	(C2H3Br)	C=CBr	0	3	0	0	2	0	0	1	79.2	81.54
8	3-Bromo-3-methyldiazirine	(C2H3BrN2)	CC1(Br)N=N1	2	3	0	0	0	2	0	1	291	303.85
9	Acetyl bromide	(C2H3BrO)	CC(=O)Br	1	3	0	0	1	0	1	1	-196	-197.67
10	Ethyl bromide	(C2H5Br)	CCBr	2	5	0	0	0	0	0	1	-63.6	-68.07
11	Acetylene, bromo-	(C2HBr)	C#CBr	0	1	0	0	2	0	0	1	269	273.28
12	1-Propene, 3-bromo-	(C3H5Br)	C=CCBr	1	5	0	0	2	0	0	1	47.7	48.77
13	(Z)-1-Bromo-1-propene	(C3H5Br)	C/C=C\Br	1	5	0	0	2	0	0	1	40.8	48.92
14	(E)-1-Bromo-1-propene	(C3H5Br)	C/C=C/Br	1	5	0	0	2	0	0	1	43.9	55.2
15	Bromoacetone	(C3H5BrO)	CC(=O)CBr	2	5	0	0	1	0	1	1	-180	-188.14
16	Propane, 1-bromo-	(C3H7Br)	CCCBr	3	7	0	0	0	0	0	1	-92	-88.7
17	Propane, 2-bromo-	(C3H7Br)	CC(C)Br	3	7	0	0	0	0	0	1	-98.5	-87.77
18	Butane, 1-bromo-	(C4H9Br)	CCCCBr	4	9	0	0	0	0	0	1	-107	-108.84
19	Propane, 2-bromo-2-methyl-	(C4H9Br)	CC(C)(C)Br	4	9	0	0	0	0	0	1	-132.4	-108.84
20	Butane, 2-bromo-	(C4H9Br)	CCC(C)Br	4	9	0	0	0	0	0	1	-120	-105.09
21	Pentane, 1-bromo-	(C5H11Br)	CCCCCBr	5	11	0	0	0	0	0	1	-129.8	-129.15
22	Cyclopentane, bromo-	(C5H9Br)	C1CCC(C1)Br	5	9	0	0	0	0	0	1	9.83	-74.4
23	Hexane, 1-bromo-	(C6H13Br)	CCCCCCBr	6	13	0	0	0	0	0	1	-150.1	-149.3
24	Heptane, 1-bromo-	(C7H15Br)	CCCCCCCBr	7	15	0	0	0	0	0	1	-170.2	-169.41
25	Benzoyl bromide	(C7H5BrO)	c1ccc(cc1)C(=O)Br	0	5	0	0	7	0	1	1	-48.5	-62.2
26	Benzoic acid, 4-bromo-	(C7H5BrO2)	c1cc(ccc1C(=O)O)Br	0	5	0	1	7	0	1	1	-275.9	-244
27	Benzoic acid, 2-bromo-	(C7H5BrO2)	c1ccc(c(c1)C(=O)O)Br	0	5	0	1	7	0	1	1	-246.9	-234.99
28	Benzoic acid, 3-bromo-	(C7H5BrO2)	c1cc(cc(c1)Br)C(=O)O	0	5	0	1	7	0	1	1	-268.3	-234.99
29	Benzene, (bromomethyl)-	(C7H7Br)	c1ccc(cc1)CBr	1	7	0	0	6	0	0	1	84	74.2
30	Octane, 1-bromo-	(C8H17Br)	CCCCCCCCBr	8	17	0	0	0	0	0	1	-190.1	-189.51
31	Cyanogen bromide	(CBrN)	C(#N)Br	0	0	0	0	1	1	0	1	185.6	179.18
32	Methane, bromotrinitro-	(CBrN3O6)	C(Br)(N(=O)=O)(N(=O)=O)N(=O)=O	1	0	0	0	0	3	6	1	94.6	65.7
33	Methane, bromo-	(CH3Br)	CBr	1	3	0	0	0	0	0	1	-34.3	-39.18
34	Hydrogen bromide	(BrH)	Br	0	1	0	0	0	0	0	1	-36.29	-26.42

## Sheet: CHNOI
ID	Name	Formula	SMILES	NC	NH	NN	NO	NC'	NN'	NO'	NX	Delta Hf (ref) kJ/mol	Delta Hf (model) kJ/mol
1	Naphthalene, 1-iodo-	(C10H7I)	c1ccc2c(c1)cccc2I	0	7	0	0	10	0	0	1	234	236.2
2	Naphthalene, 2-iodo-	(C10H7I)	c1ccc2cc(ccc2c1)I	0	7	0	0	10	0	0	1	235	230.81
3	1-Iodo-1,1-dinitroethane	(C2H3IN2O4)	CC(I)(N(=O)=O)N(=O)=O	2	3	0	0	0	2	4	1	34	20.57
4	Acetyl iodide	(C2H3IO)	CC(=O)I	1	3	0	0	1	0	1	1	-125	-134.08
5	Ethane, iodo-	(C2H5I)	CCI	2	5	0	0	0	0	0	1	-7.2	-10.29
6	Iodomethyl methyl ether	(C2H5IO)	COCI	2	5	0	1	0	0	0	1	-123	-103.13
7	(Z)-1-Iodo-1-propene	(C3H5I)	C/C=C\I	1	5	0	0	2	0	0	1	86.4	107.39
8	(E)-1-Iodo-1-propene	(C3H5I)	C/C=C/I	1	5	0	0	2	0	0	1	93.1	113.17
9	1-iodoacetone	(C3H5IO)	CC(=O)CI	2	5	0	0	1	0	1	1	-130.6	-134.99
10	Propane, 1-iodo-	(C3H7I)	CCCI	3	7	0	0	0	0	0	1	-31	-31.35
11	1-Iodo-1,1,3,3-tetranitrobutane	(C4H5IN4O8)	CC(CC(I)(N(=O)=O)N(=O)=O)(N(=O)=O)N(=O)=O	4	5	0	0	0	4	8	1	41	2.23
12	3-Iodo-2-butanone	(C4H7IO)	CC(C(=O)C)I	3	7	0	0	1	0	1	1	-160	-158.03
13	tert-Butyl iodide	(C4H9I)	CC(C)(C)I	4	9	0	0	0	0	0	1	-72	-57.1
14	Benzene, iodo-	(C6H5I)	c1ccc(cc1)I	0	5	0	0	6	0	0	1	165	165.22
15	Benzoyl iodide	(C7H5IO)	c1ccc(cc1)C(=O)I	0	5	0	0	7	0	1	1	11	2.09
16	Benzoic acid, 4-iodo-	(C7H5IO2)	c1cc(ccc1C(=O)O)I	0	5	0	1	7	0	1	1	-215.6	-183.8
17	Benzoic acid, 2-iodo-	(C7H5IO2)	c1cc(ccc1C(=O)O)I	0	5	0	1	7	0	1	1	-202.8	-183.8
18	Benzoic acid, 3-iodo-	(C7H5IO2)	c1cc(cc(c1)I)C(=O)O	0	5	0	1	7	0	1	1	-219	-182.1
19	Benzene, 1-iodo-2-methyl-	(C7H7I)	Cc1ccccc1I	1	7	0	0	6	0	0	1	133	137.06
20	Benzene, 1-iodo-3-methyl-	(C7H7I)	Cc1cccc(c1)I	1	7	0	0	6	0	0	1	133	137.06
21	Benzene, 1-iodo-4-methyl-	(C7H7I)	Cc1ccc(cc1)I	1	7	0	0	6	0	0	1	122	135.54
22	Benzene, (iodomethyl)-	(C7H7I)	c1ccc(cc1)CI	1	7	0	0	6	0	0	1	127.3	129.24
23	Methane, iodo-	(CH3I)	CI	1	3	0	0	0	0	0	1	14.3	14.86
24	Cyanogen iodide	(CIN)	C(#N)I	0	0	0	0	1	1	0	1	225.94	224.2
25	Methane, iodotrinitro-	(CIN3O6)	C(I)(N(=O)=O)(N(=O)=O)N(=O)=O	1	0	0	0	0	3	6	1	163	125.43
26	Hydrogen iodide	(HI)	I	0	1	0	0	0	0	0	1	26.5	35.67
27	Iodine atom	(I)	[I]	0	0	0	0	0	0	0	1	106.76	115.67
28	Nitrosyl iodide	(INO)	IN=O	0	0	0	0	0	1	1	1	112.13	117.73
29	(Z)-1,2-Diiodoethylene	(C2H2I2)	C(=C\I)\I	0	2	0	0	2	0	0	2	207.4	216.49
30	Ethane, 1,2-diiodo-	(C2H4I2)	C(CI)I	0	4	0	0	2	0	0	2	73.3	85.13
31	1,3-Diiodo-1,1,3,3-tetranitropropane	(C3H2I2N2O4)	C(C(I)(N(=O)=O)N(=O)=O)C(I)(N(=O)=O)N(=O)=O	3	2	0	0	0	4	8	2	149	166.41
32	Propane, 1,3-diiodo-	(C3H6I2)	C(CI)CI	3	6	0	0	0	0	0	2	45.2	39.71
33	1,2-Diiodopropane	(C3H6I2)	CC(CI)I	3	6	0	0	0	0	0	2	35.6	39.71
34	1,3-Diiodocyclobutane	(C4H6I2)	C1C(CC1I)I	4	6	0	0	0	0	0	2	193	149.97
35	Butane, 1,4-diiodo-	(C4H8I2)	C(CCI)CI	4	8	0	0	0	0	0	2	29	16.33
36	1,2-Diiodobutane	(C4H8I2)	CCC(CI)I	4	8	0	0	0	0	0	2	12.3	16.33
37	Benzene, 1,2-diiodo-	(C6H4I2)	c1ccc(c(c1)I)I	0	4	0	0	6	0	0	2	252	255.55
38	Iodoquinol	(C9H5I2NO)	c1cc2c(cc(c(c2nc1)O)I)I	0	5	0	1	9	1	0	2	220.3	198.21
39	Methane, diiodo-	(CH2I2)	C(I)I	1	2	0	0	0	0	0	2	118	106.35
40	Iodine	(I2)	II	0	0	0	0	0	0	0	2	62.42	59.31
